# Supplementary material for: Chondroitin Sulfate/Dermatan Sulfate Hybrid Chains from Swim Bladder: Isolation, Structural Analysis, and Anticoagulant Activity
Source: MDPI journal article supplement (doi:10.3390/md22010009), 2023-12-21
Supplement: s1 [file s1]

## Supplementary Data

# Chondroitin Sulfate/Dermatan Sulfate Hybrid Chains from Swim Bladder: Isolation, Structural Analysis, and Anticoagulant Activity

Yue Yao <sup>1,2,†</sup>, Hao Tang <sup>1,†</sup>, Haiqiong Ma <sup>1</sup>, Zidong Liu <sup>1</sup>, Jinwen Huang <sup>1</sup>, Xiufen Yang <sup>2,\*</sup>, Longyan Zhao <sup>1,\*</sup> and Qingxia Yuan <sup>1,\*</sup>

<sup>1</sup> Guangxi Key Laboratory of Marine Drugs, Institute of Marine Drugs, Guangxi University of Chinese Medicine, Nanning 530200, China

<sup>2</sup> School of Pharmacy, Guangxi University of Chinese Medicine, Nanning 530200, China

\* Correspondence: xiufenyang@163.com (X.Y.); longyanzhao@gmail.com (L.Z.); qingxiayuan@163.com (Q.Y.)

<sup>†</sup> These authors contributed equally to this work.

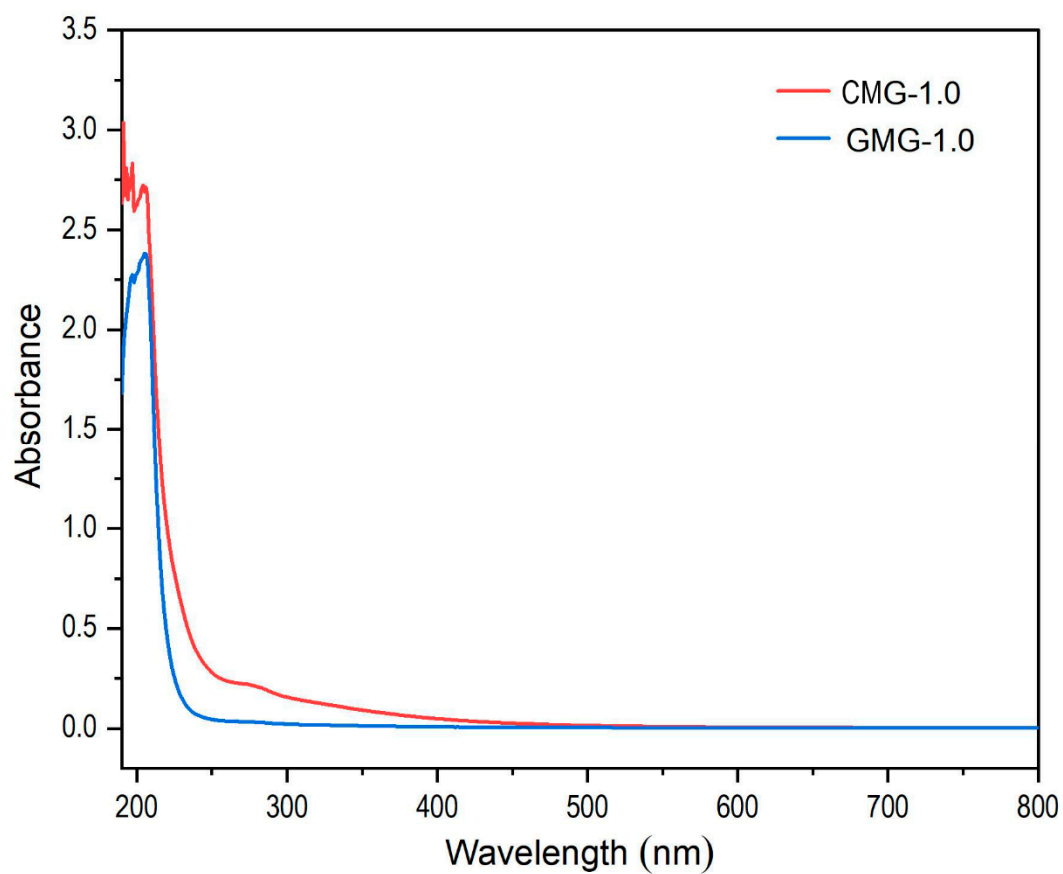

**Figure S1.** UV spectrum of CMG-1.0 and GMG-1.0

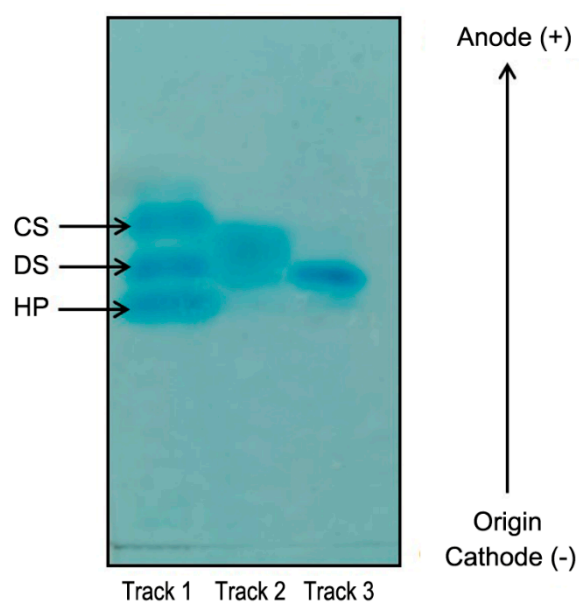

**Figure S2.** Electrophoretogram of CMG-1.0 (Track 2) and GMG-1.0 (Track 3)

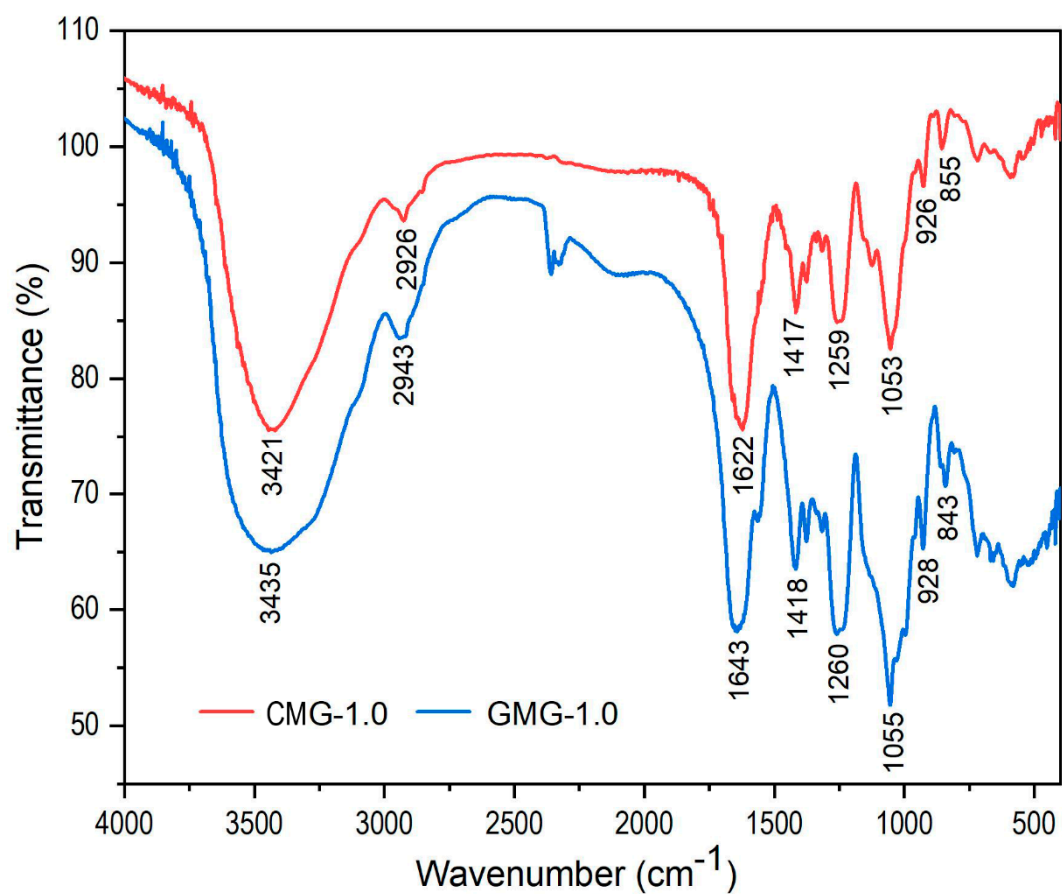

Figure S3. FT-IR spectra of CMG-1.0 and GMG-1.0

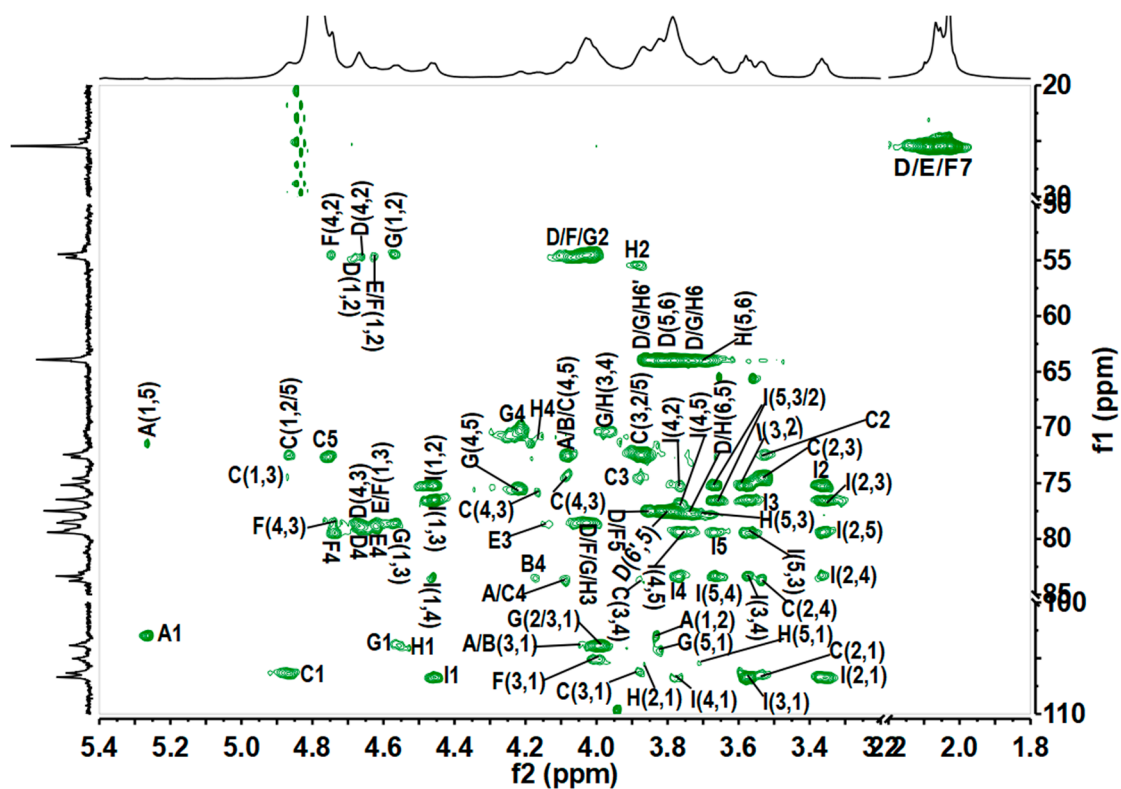

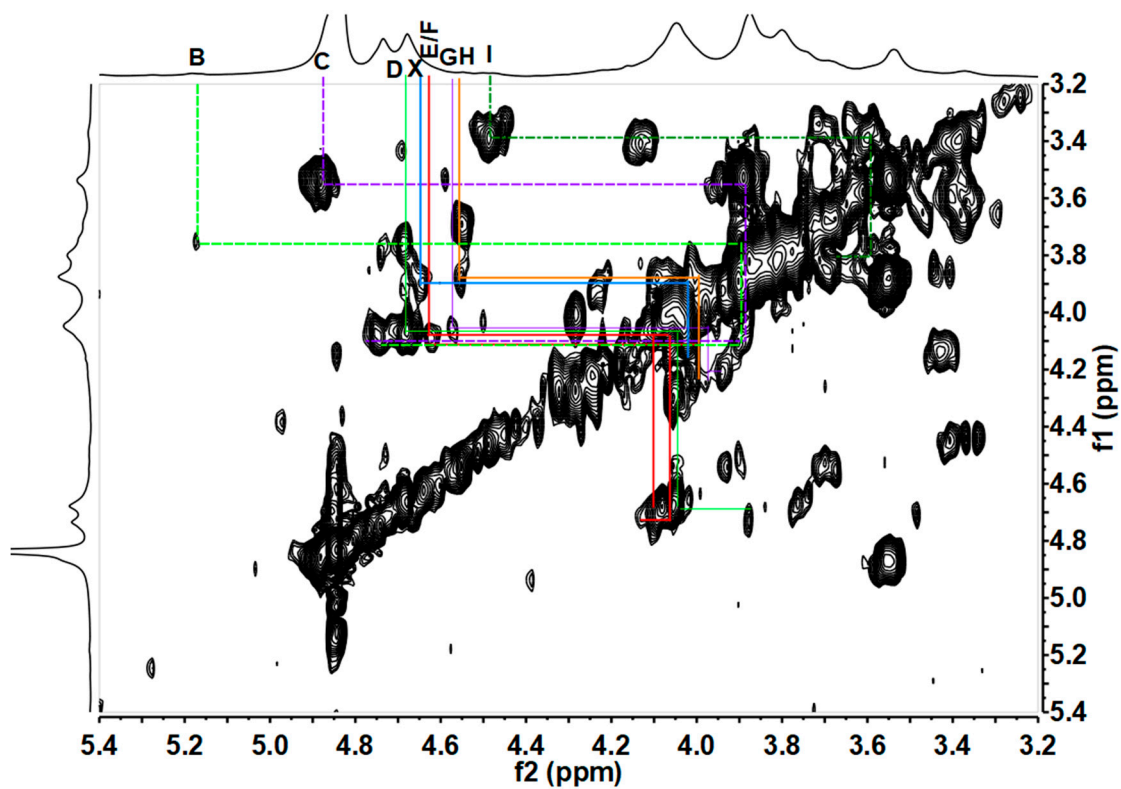

Figure S5.  $^1\text{H}$ - $^1\text{H}$  COSY spectrum of GMG-1.0

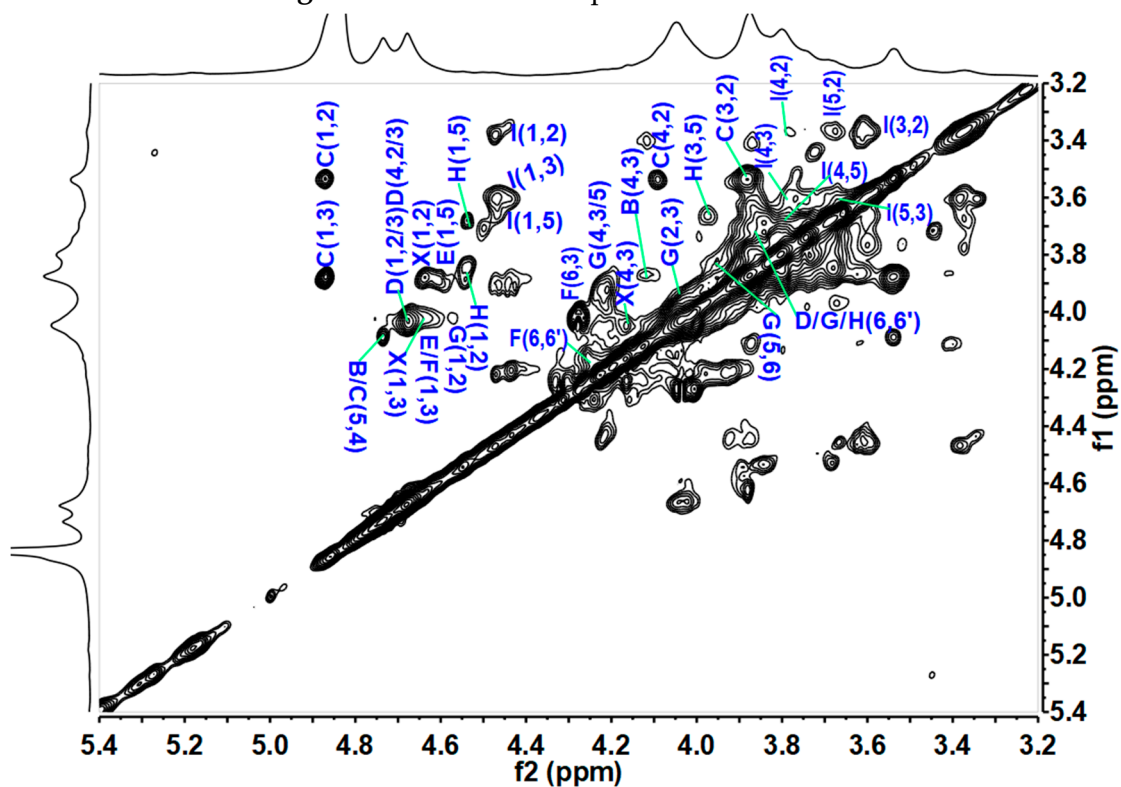

Figure S6.  $^1\text{H}$ - $^1\text{H}$  TOCSY spectrum of GMG-1.0

**Table S1.** Assignment of <sup>1</sup>H and <sup>13</sup>C NMR signals of GMG-1.0.

| Residues                   | H/C | Chemical Shifts (δ,ppm) <sup>a</sup> |                          |             |                          |      |                  |       |      |
|----------------------------|-----|--------------------------------------|--------------------------|-------------|--------------------------|------|------------------|-------|------|
|                            |     | 1                                    | 2                        | 3           | 4                        | 5    | 6                | 7     | 8    |
| A                          | H   | 5.27                                 | <u>3.85</u> <sup>b</sup> | n.d.        | <b>4.10</b> <sup>c</sup> | 4.76 |                  |       |      |
| α-D-IdoA <sub>2S</sub>     | C   | 103.6                                | <u>79.0</u>              | n.d.        | <b>83.0</b>              | 72.4 | 176.8            |       |      |
| B                          | H   | 5.18                                 | <u>3.76</u>              | 3.87        | <b>4.12</b>              | 4.74 |                  |       |      |
| α-D-IdoA <sub>2S</sub>     | C   | 103.2                                | <u>79.1</u>              | 73.5        | <b>83.7</b>              | 72.7 | 176.8            |       |      |
| C                          | H   | 4.87                                 | 3.54                     | 3.89        | <b>4.08</b>              | 4.74 |                  |       |      |
| α-D-IdoA                   | C   | 106.2                                | 72.4                     | 74.5        | <b>83.7</b>              | 72.7 | 176.8            |       |      |
| D                          | H   | 4.67                                 | 4.08                     | <b>4.04</b> | <u>4.68</u>              | 3.87 | 3.74/3.84        |       | 2.08 |
| β-D-GalNAc <sub>4S</sub>   | C   | 105.0                                | 54.3                     | <b>78.1</b> | <u>78.9</u>              | 77.4 | 63.8             | 178.1 | 25.0 |
| X                          | H   | 4.64                                 | <u>3.89</u>              | <b>4.02</b> | 4.16                     | 3.85 | <u>4.17/4.84</u> |       | 2.08 |
| β-D-GalN <sub>2S6S</sub>   | C   | 105.3                                | <u>55.0</u>              | <b>78.9</b> | 70.8                     | 77.4 | <u>70.0</u>      | 178.1 | 25.0 |
| E                          | H   | 4.62                                 | 4.10                     | <b>4.08</b> | <u>4.65</u>              | 3.88 | 3.73/3.84        |       | 2.05 |
| β-D-GalNAc <sub>4S</sub>   | C   | 105.0                                | 54.7                     | <b>78.6</b> | <u>79.1</u>              | 77.7 | 63.9             | 177.9 | 25.5 |
| F                          | H   | 4.61                                 | 4.08                     | <b>4.04</b> | <u>4.73</u>              | 4.15 | <u>4.17/4.25</u> |       | 2.04 |
| β-D-GalNAc <sub>4S6S</sub> | C   | 105.0                                | 54.3                     | <b>78.9</b> | <u>79.4</u>              | 75.7 | <u>70.0</u>      | 177.9 | 25.5 |
| G                          | H   | 4.56                                 | 4.02                     | <b>3.96</b> | 4.21                     | 3.93 | 3.74/3.84        |       | 2.04 |
| β-D-GalNAc                 | C   | 105.0                                | 54.5                     | <b>78.6</b> | 70.3                     | 77.4 | 63.9             | 177.4 | 25.5 |
| H                          | H   | 4.54                                 | <u>3.88</u>              | <b>4.00</b> | 4.19                     | 3.69 | 3.70/3.80        |       |      |
| β-D-GalN <sub>2S</sub>     | C   | 105.4                                | <u>55.0</u>              | <b>78.4</b> | 70.8                     | 77.4 | 63.8             |       |      |
| I                          | H   | 4.48                                 | 3.36                     | 3.59        | <b>3.78</b>              | 3.67 |                  |       |      |
| β-D-GlcA                   | C   | 106.5                                | 75.1                     | 76.4        | <b>83.3</b>              | 79.1 | 177.4            |       |      |

n.d. -not detected. <sup>a</sup> The 600 MHz NMR spectra were recorded at 298 K. All chemical shifts are relative to TSP at 0 ppm. <sup>b,c</sup> Values with underline and in boldface indicate sulfated and glycosylated positions, respectively.

## Species Identification Results

*Cynoscion microlepidotus* was confirmed by the partial sequence of mitochondrial 16S

rRNA gene sequence:

CCTCTACCTAGTTTTTGGTGCATGAGCCGGAATAGTGGGCACAGCTTTGAGCCTTCTG  
 ATTCGAGCAGAACTCAGTCAACCAGGCGCACTCCTCGGAGACGACCAGGTTTATAAC  
 GTAATCGTTACAGCACACGCCTTTGTTATAATTTTCTTTATAGTAATGCCCATCATGAT  
 CGGAGGGTTTGGAAGTGAAGTACTTATCCCGCTAATGATCGGAGCCCCCGACATGGCATT  
 CCCCCGAATAAATAATATGAGCTTCTGACTTCTACCACCCTCCTTCCTCCTACTCTTAA  
 CCTCATCAGGGGTAGAAGCAGGGGGCCGGAACGGGCTGAACAGTTTATCCCCCACTTG  
 CGGGCAATCTAGCACATGCAGGGGCTTCCGTCGACTTAGCCATCTTCTCCCTGCATCT  
 CGCAGGTGTGTCCTCGATTCTAGGGGCTATCAACTTCATTACAACCATTATTAATATG  
 AAACCTCCCGCTATCTCCAGTATCAGACACCTCTGTTTGTATGGGCCGTCCTAATTA  
 CAGCTGTCCTCTTACTGCTCTCGCTCCCTGTCTTAGCTGCCGGTATTACAATACTCCTT

ACAGACCGCAATCTCAACACAACCTTCTTCGACCCCGCAGGAGGGGGGACCCAATT  
CTCTATCAACACTTATTC

*Gadus morhua* was confirmed by the partial sequence of mitochondrial 16S rRNA gene sequence:

CGCCTCTTGCTCCAAAAATATAAGAGGTCCCGCCTGCCCTGTGACTATAAGTTTAACG  
GCCGCGGTATTTTAACCGTGCGAAGGTAGCGTAATCACTTGTCTTTTAAATGAAGACC  
TGTATGAATGGCATCACGAGGGCTTAGCTGTCTCCCATCTCCAGTCAATGAAATTGAC  
CTCCCCGTGCAGAGGCGGGGATAATTACATAAGACGAGAAGACCCCTATGGAGCTTTA  
GACCTAAAGTAAGTCACGTTTAACATGCTGTGATAACAGTAAAACTTAGTGATATTT  
ACTGAAGTGTCTTTGGTTGGGGCGACCGCGGGGTAAAACACAACCCCCATGTGGACC  
GGGGATATTATCCCTAATACTCAGAGCCTCTACTCCAAGTAACAGAAATTCTGACTTT  
TCTGATCCGGTATAACCGATCAACGAACCGAGTTACCCTAGGGATAACAGCGCAATC  
CCCTCTCAGAGCCCATATCGACGAGGGGGTTTACGACCTCGATGTTGGATCAGGACA  
TCCTAATGGTGCAGCCGCTATTAAGGGTTCGTTTGTTCACGATTAAAGTCCT

Based on the National Center for Biotechnology Information (NCBI) Genbank, the BLAST analysis revealed that the sequence similarity with *Cynoscion microlepidotus* and *Gadus morhua* sequence was 100%.
